# Supplementary material for: Bandgap evolution in nanographene assemblies
Source: Royal Society of Chemistry journal article supplement (doi:10.1039/d1cp01030a), 2021-01-01
Supplement: d1cp01030a1.pdf [file d1cp01030a1.pdf]

## Supplementary Material: Bandgap evolution in nanographene assemblies

F. Crasto de Lima<sup>1,\*</sup> and A. Fazzio<sup>1,†</sup>

<sup>1</sup>*Brazilian Nanotechnology National Laboratory CNPEM,*

*C.P. 6192, 13083-970, Campinas, SP, Brazil*

(Dated: March 4, 2021)

## ASSEMBLIES

Studied assemblies atomic geometry, with the unit cell marked in red and band structure. The label name is just for reference.

### Ha

Structure with label “Ha” presenting 108 carbon atoms in the hexagonal unit cell, inter-molecule bond density  $\eta = 3.0$ , and TB predicted energy gap of 1.89 eV.

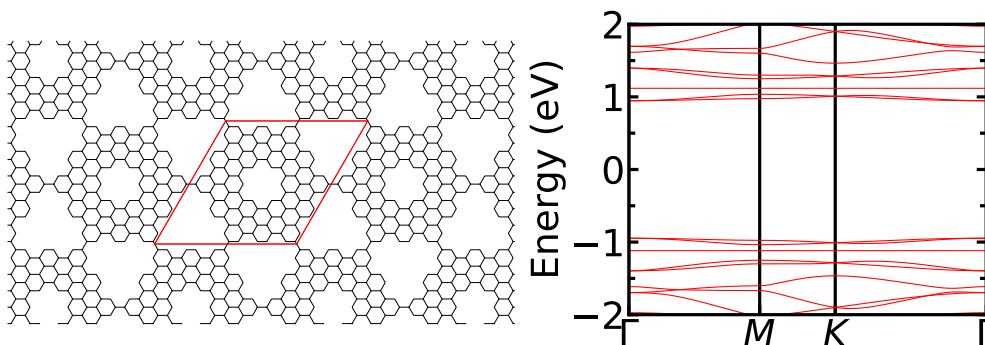

FIG. S1. Ha.

### Hb

Structure with label “Hb” presenting 108 carbon atoms in the hexagonal unit cell, inter-molecule bond density  $\eta = 9.0$ , and TB predicted energy gap of 1.22 eV.

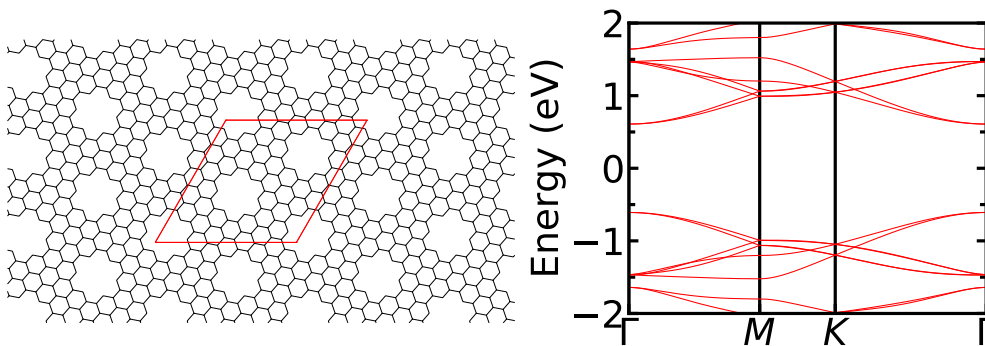

FIG. S2. Hb.

### Hc

Structure with label “Hc” presenting 108 carbon atoms in the hexagonal unit cell, intermolecule bond density  $\eta = 15.0$ , and TB predicted energy gap of 0.44 eV.

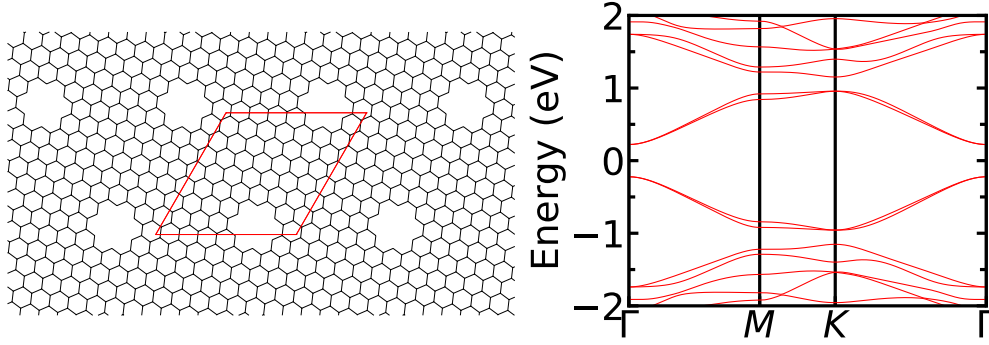

FIG. S3. Hc.

### Hga

Structure with label “Hga” presenting 216 carbon atoms in the hexagonal unit cell, intermolecule bond density  $\eta = 1.5$ , and TB predicted energy gap of 1.95 eV.

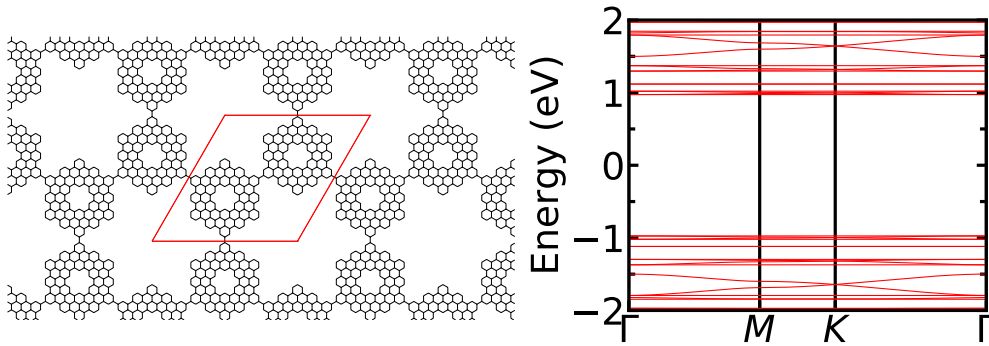

FIG. S4. Hga.

### Hgb

Structure with label “Hgb” presenting 216 carbon atoms in the hexagonal unit cell, inter-molecule bond density  $\eta = 4.5$ , and TB predicted energy gap of 1.57 eV.

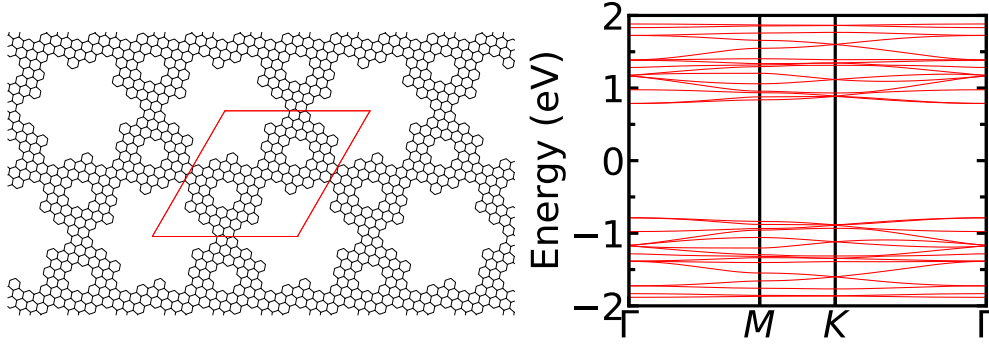

FIG. S5. Hgb.

### Hgc

Structure with label “Hgc” presenting 216 carbon atoms in the hexagonal unit cell, inter-molecule bond density  $\eta = 7.5$ , and TB predicted energy gap of 1.26 eV.

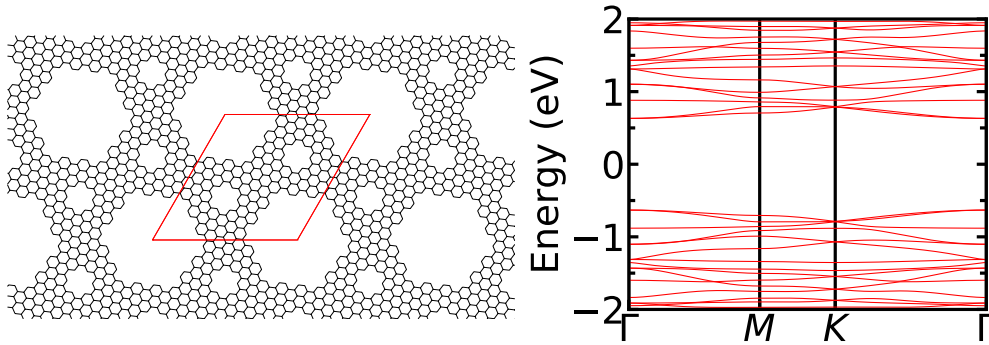

FIG. S6. Hgc.

### Hka

Structure with label “Hka” presenting 324 carbon atoms in the hexagonal unit cell, inter-molecule bond density  $\eta = 2.0$ , and TB predicted energy gap of 1.92 eV.

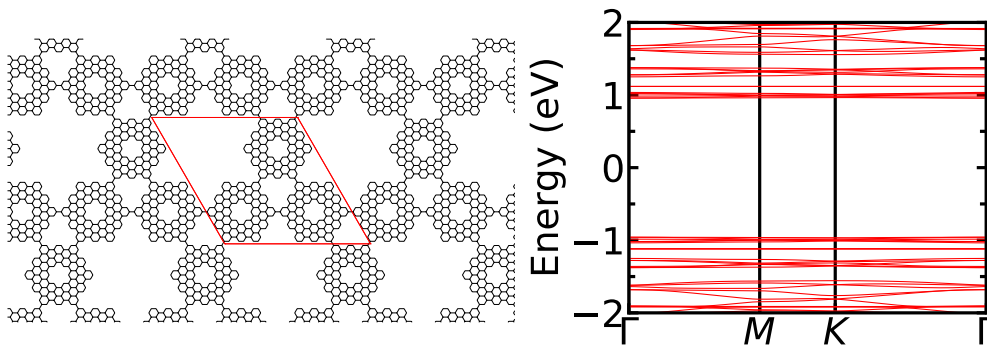

FIG. S7. Hka.

### Hkb

Structure with label “Hkb” presenting 324 carbon atoms in the hexagonal unit cell, inter-molecule bond density  $\eta = 6.0$ , and TB predicted energy gap of 1.44 eV.

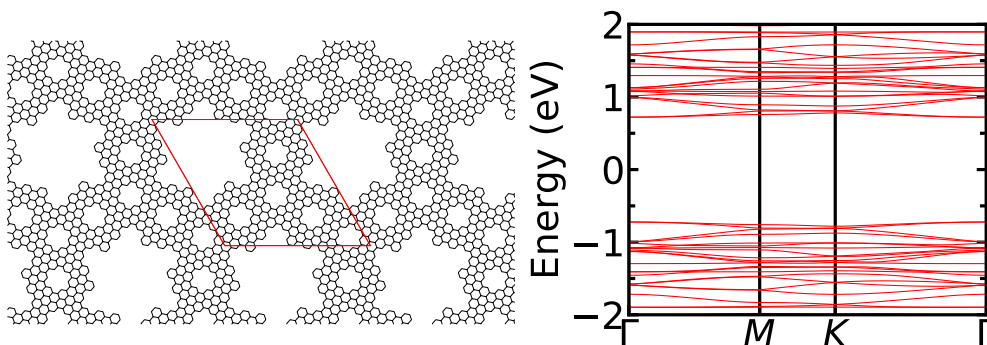

FIG. S8. Hkb.

### Hkc

Structure with label “Hkc” presenting 324 carbon atoms in the hexagonal unit cell, inter-molecule bond density  $\eta = 10.0$ , and TB predicted energy gap of 1.01 eV.

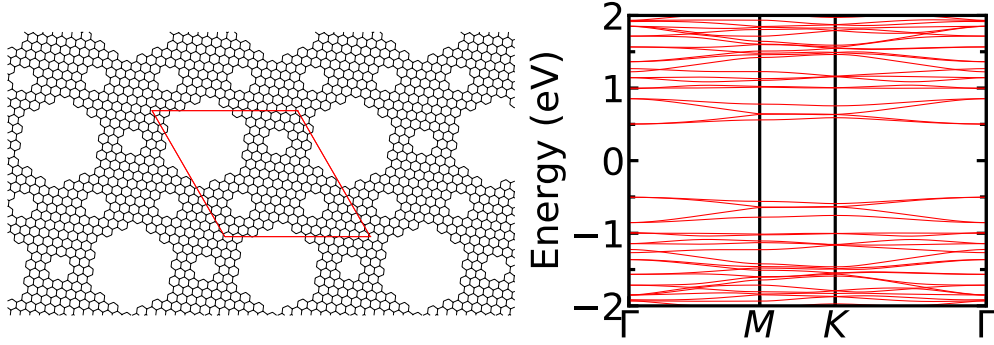

FIG. S9. Hkc.

### Htka

Structure with label “Htka” presenting 324 carbon atoms in the tetragonal unit cell, inter-molecule bond density  $\eta = 2.0$ , and TB predicted energy gap of 1.92 eV.

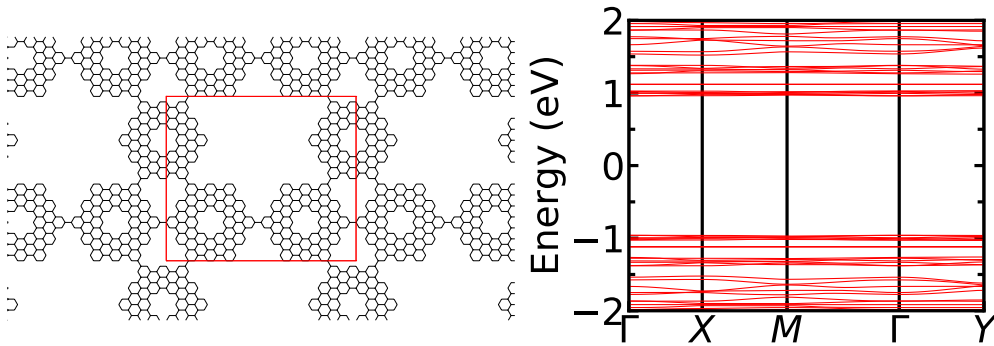

FIG. S10. Htka.

### Htkb

Structure with label “Htkb” presenting 324 carbon atoms in the tetragonal unit cell, inter-molecule bond density  $\eta = 6.0$ , and TB predicted energy gap of 1.42 eV.

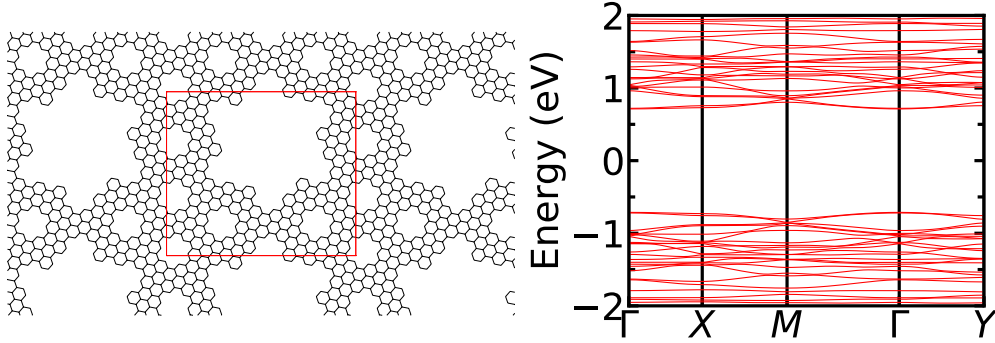

FIG. S11. Htkb.

### Htkc

Structure with label “Htkc” presenting 324 carbon atoms in the tetragonal unit cell, inter-molecule bond density  $\eta = 10.0$ , and TB predicted energy gap of 0.93 eV.

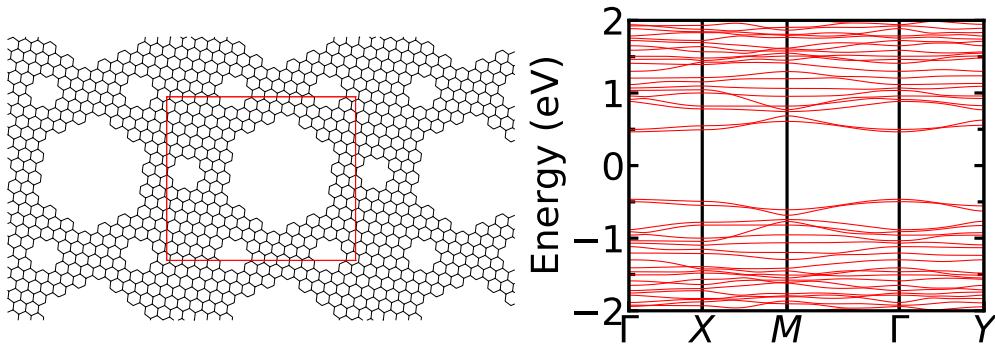

FIG. S12. Htkc.

### H3a

Structure with label “H3a” presenting 864 carbon atoms in the hexagonal unit cell, inter-molecule bond density  $\eta = 2.625$ , and TB predicted energy gap of 1.90 eV.

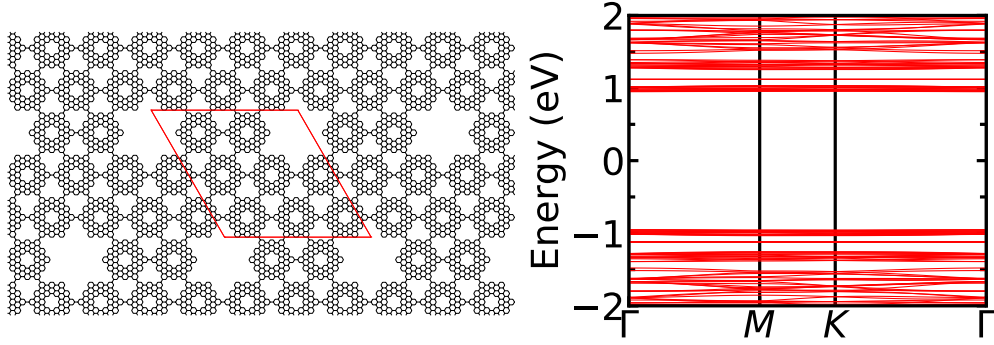

FIG. S13. Ha.

### H3b

Structure with label “H3b” presenting 864 carbon atoms in the hexagonal unit cell, inter-molecule bond density  $\eta = 7.875$ , and TB predicted energy gap of 1.28 eV.

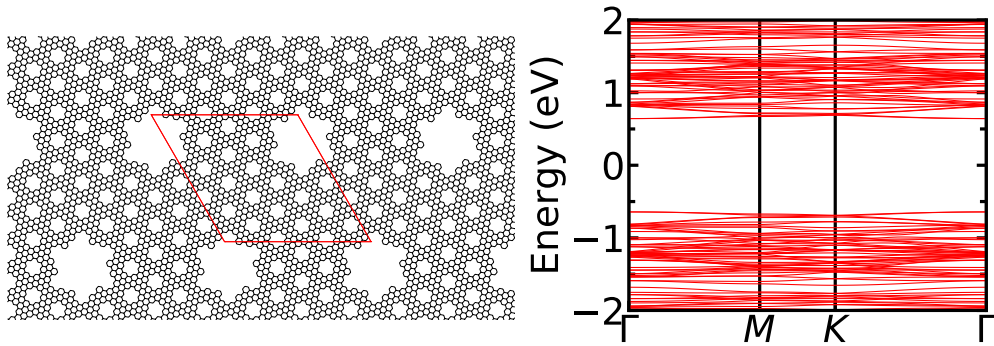

FIG. S14. H3b.



### H3c

Structure with label “H3c” presenting 864 carbon atoms in the hexagonal unit cell, inter-molecule bond density  $\eta = 13.125$ , and TB predicted energy gap of 0.62 eV.

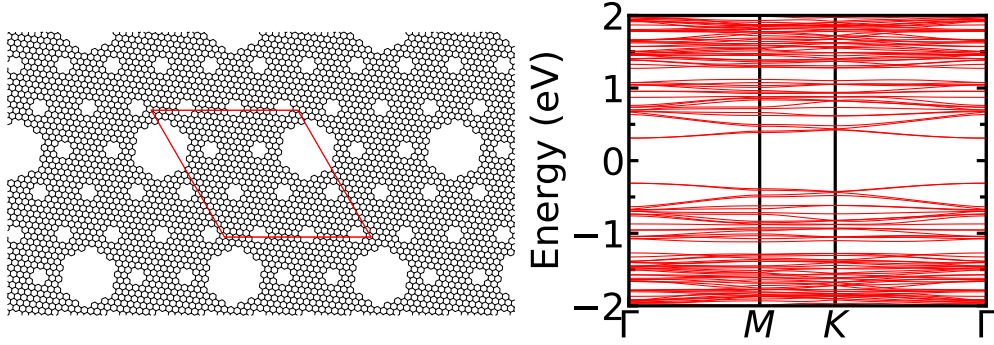

FIG. S15. H3c.

### H4a

Structure with label “H4a” presenting 1620 carbon atoms in the hexagonal unit cell, inter-molecule bond density  $\eta = 2.8$ , and TB predicted energy gap of 1.90 eV.

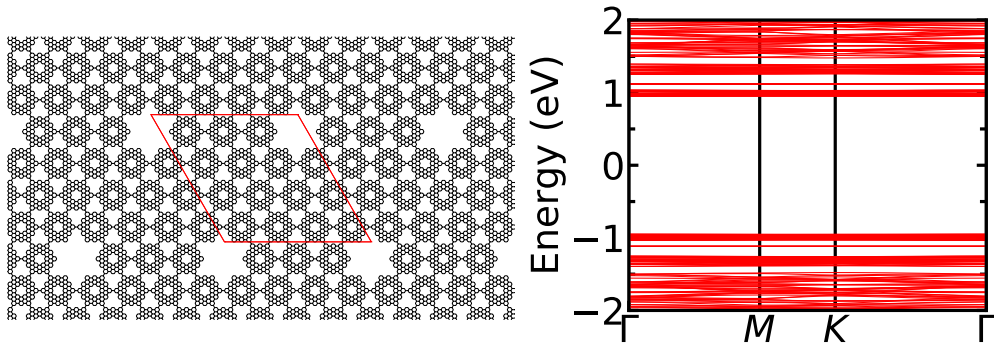

FIG. S16. H4a.

### H4b

Structure with label “H4b” presenting 1620 carbon atoms in the hexagonal unit cell, inter-molecule bond density  $\eta = 8.4$ , and TB predicted energy gap of 1.25 eV.

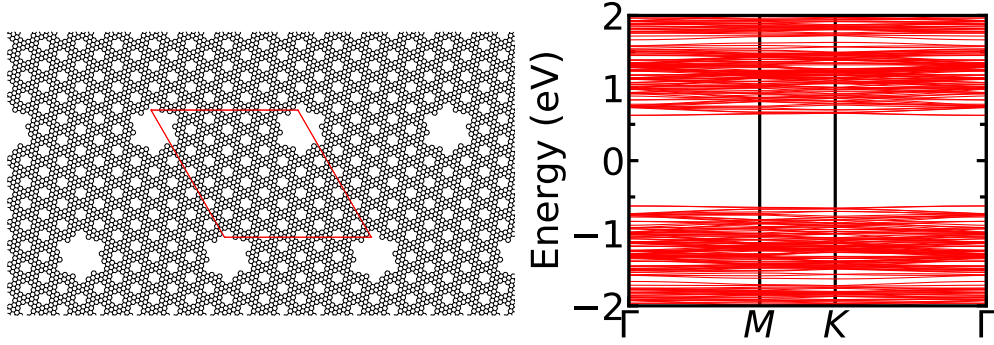

FIG. S17. H4b.

### H4c

Structure with label “H4c” presenting 1620 carbon atoms in the hexagonal unit cell, inter-molecule bond density  $\eta = 14.0$ , and TB predicted energy gap of 0.53 eV.

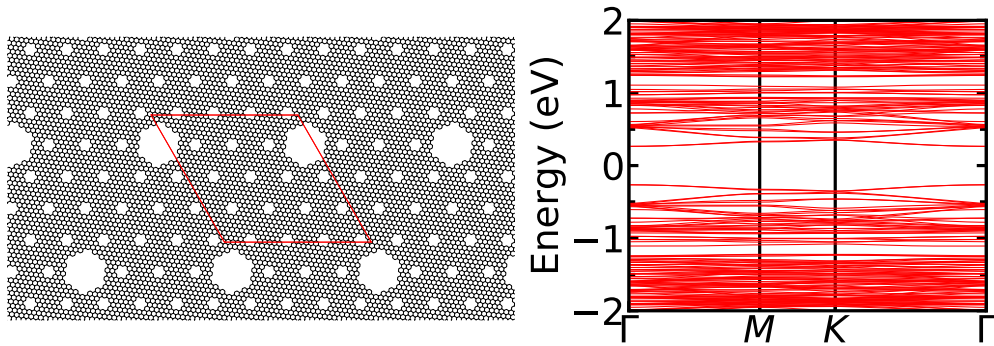

FIG. S18. H4c.

### H6a

Structure with label “H6a” presenting 1512 carbon atoms in the hexagonal unit cell, inter-molecule bond density  $\eta = 1.9286$ , and TB predicted energy gap of 1.92 eV.

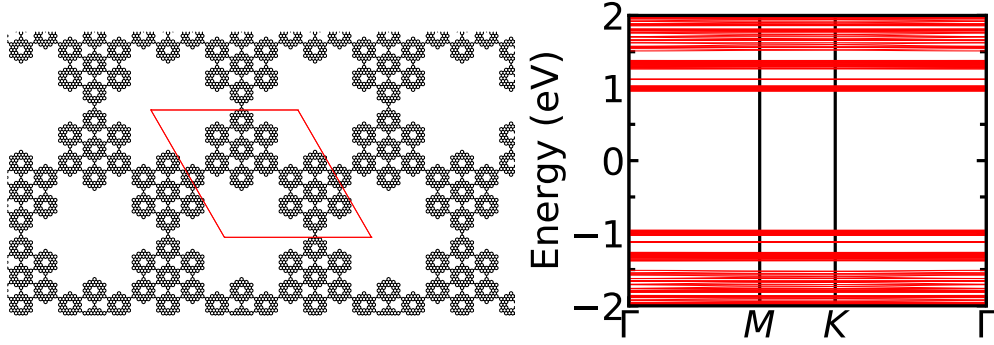

FIG. S19. H6a.

### H6b

Structure with label “H6b” presenting 1512 carbon atoms in the hexagonal unit cell, inter-molecule bond density  $\eta = 5.7857$ , and TB predicted energy gap of 1.39 eV.

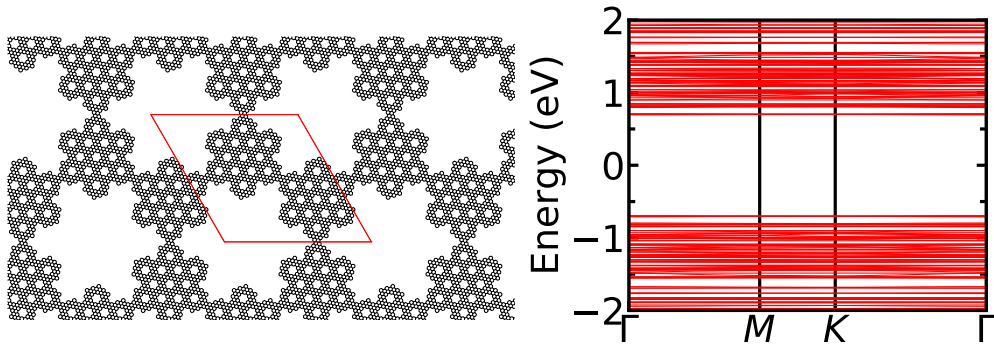

FIG. S20. H6b.

### H6c

Structure with label “H6c” presenting 1512 carbon atoms in the hexagonal unit cell, inter-molecule bond density  $\eta = 9.6428$ , and TB predicted energy gap of 0.86 eV.

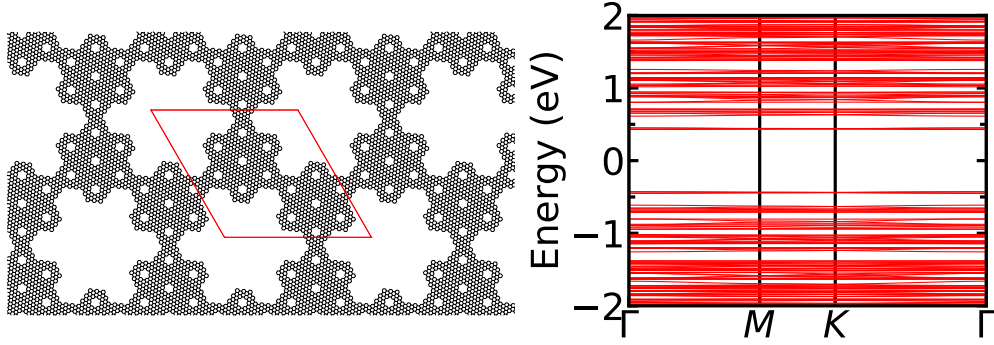

FIG. S21. H6c.

### H6ga

Structure with label “H6ga” presenting 1296 carbon atoms in the hexagonal unit cell, inter-molecule bond density  $\eta = 1.25$ , and TB predicted energy gap of 1.95 eV.

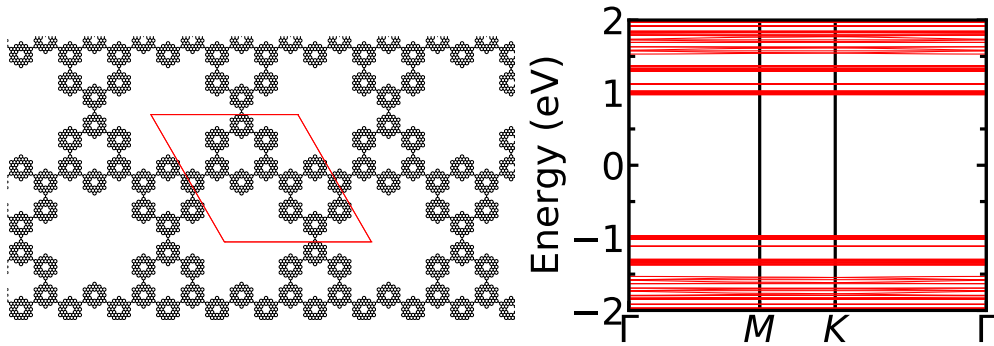

FIG. S22. H6ga.

### H6gb

Structure with label “H6gb” presenting 1296 carbon atoms in the hexagonal unit cell, inter-molecule bond density  $\eta = 3.75$ , and TB predicted energy gap of 1.61 eV.

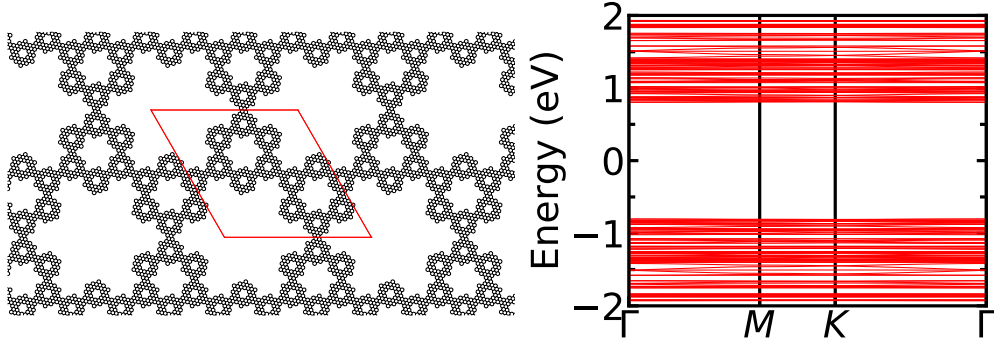

FIG. S23. H6gb.

### H6gc

Structure with label “H6gc” presenting 1296 carbon atoms in the hexagonal unit cell, inter-molecule bond density  $\eta = 6.25$ , and TB predicted energy gap of 1.32 eV.

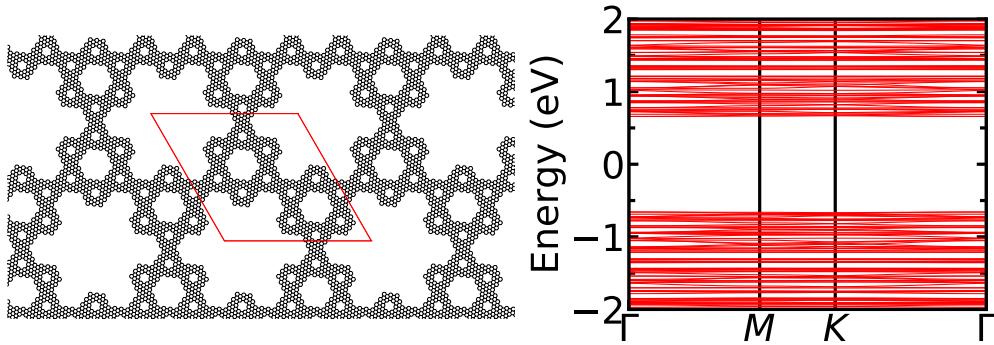

FIG. S24. H6gc.

### Hsha

Structure with label “Hsha” presenting 648 carbon atoms in the hexagonal unit cell, inter-molecule bond density  $\eta = 2.5$ , and TB predicted energy gap of 1.91 eV.

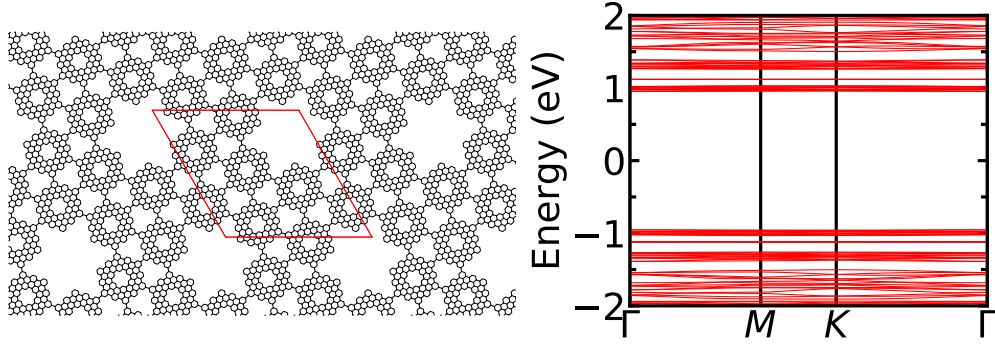

FIG. S25. Hsha.

### Hshb

Structure with label “Hshb” presenting 648 carbon atoms in the hexagonal unit cell, inter-molecule bond density  $\eta = 7.5$ , and TB predicted energy gap of 1.31 eV.

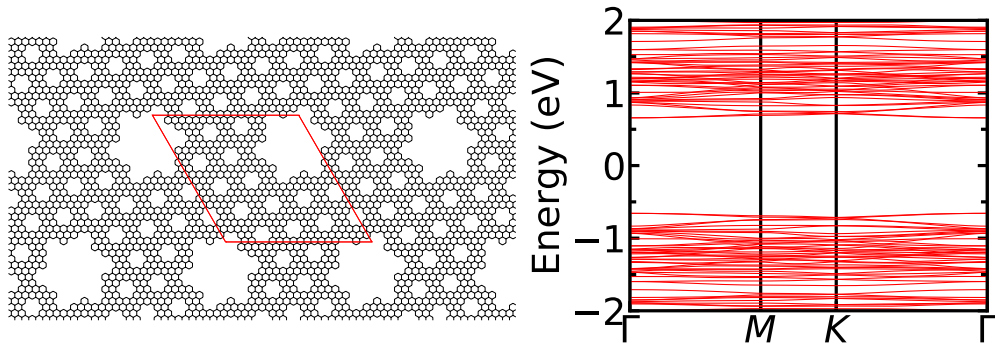

FIG. S26. Hshb.

### Hshc

Structure with label “Hshc” presenting 648 carbon atoms in the hexagonal unit cell, inter-molecule bond density  $\eta = 12.5$ , and TB predicted energy gap of 0.69 eV.

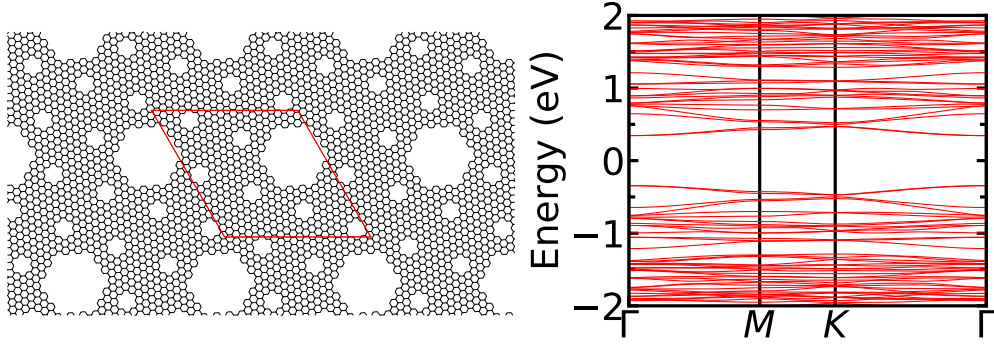

FIG. S27. Hshc.

### Hs13a

Structure with label “Hs13a” presenting 1296 carbon atoms in the hexagonal unit cell, inter-molecule bond density  $\eta = 2.75$ , and TB predicted energy gap of 1.90 eV.

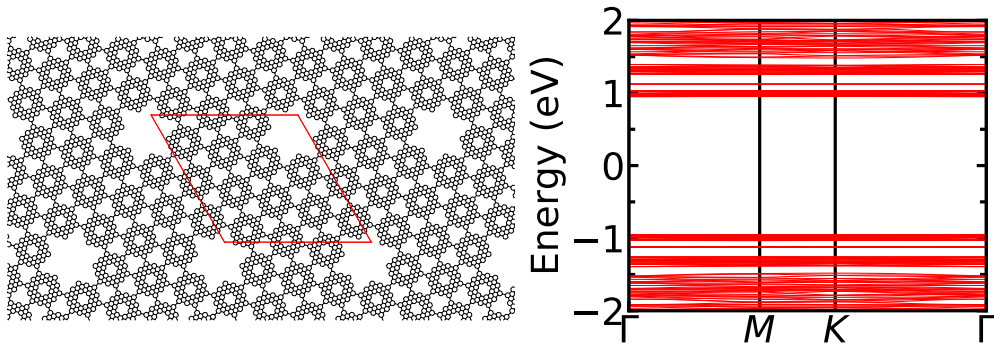

FIG. S28. Hs13a.

### Hs13b

Structure with label “Hs13b” presenting 1296 carbon atoms in the hexagonal unit cell, inter-molecule bond density  $\eta = 8.25$ , and TB predicted energy gap of 1.26 eV.

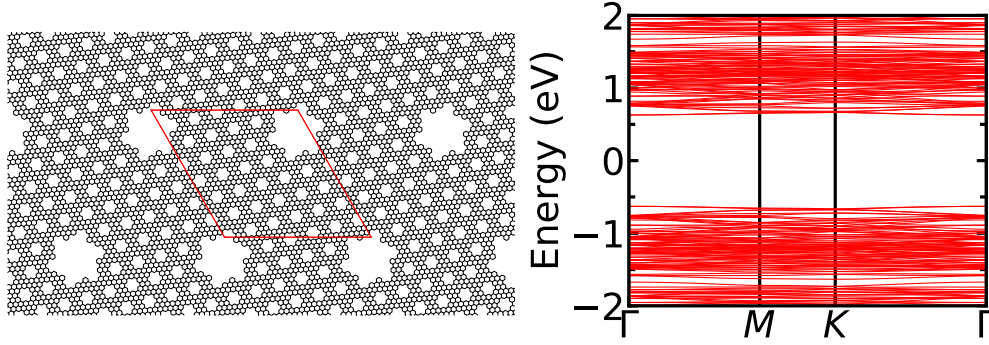

FIG. S29. Hs13b.

### Hs13c

Structure with label “Hs13c” presenting 1296 carbon atoms in the hexagonal unit cell, inter-molecule bond density  $\eta = 13.75$ , and TB predicted energy gap of 0.55 eV.

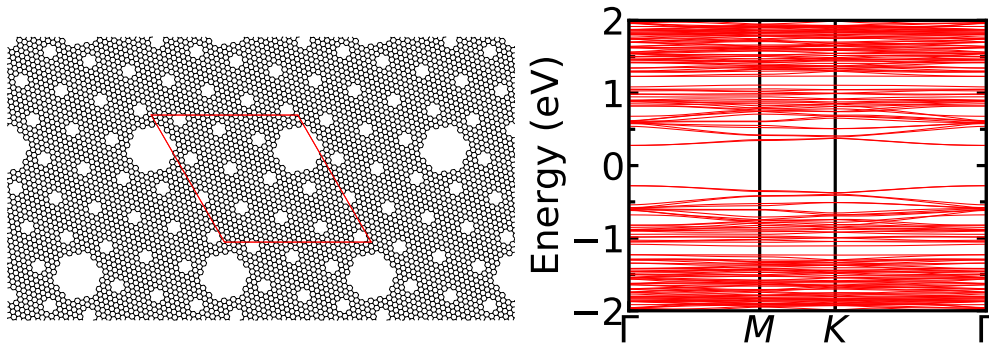

FIG. S30. Hs13c.



## Ta

Structure with label “Ta” presenting 108 carbon atoms in the oblique unit cell, intermolecule bond density  $\eta = 4.0$ , and TB predicted energy gap of 1.64 eV.

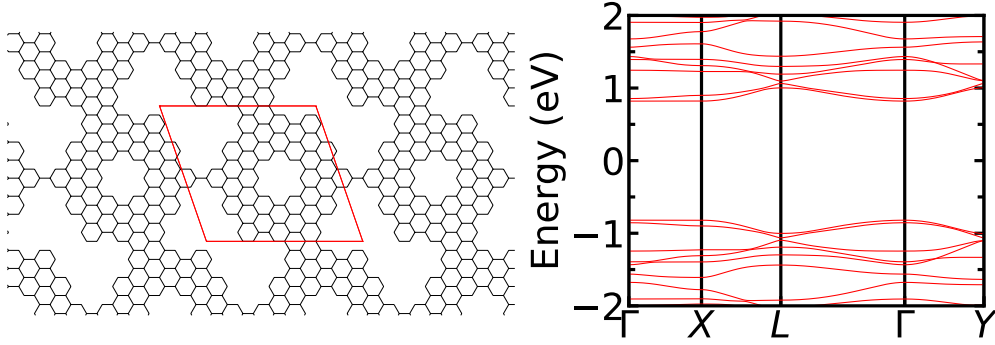

FIG. S31. Ta.

## Tb

Structure with label “Tb” presenting 108 carbon atoms in the oblique unit cell, intermolecule bond density  $\eta = 6.0$ , and TB predicted energy gap of 1.39 eV.

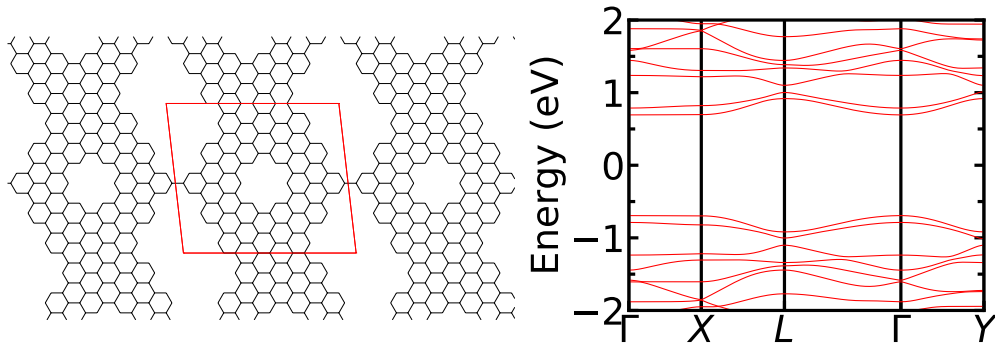

FIG. S32. Tb.

### Tc

Structure with label “Tc” presenting 108 carbon atoms in the oblique unit cell, inter-molecule bond density  $\eta = 8.0$ , and TB predicted energy gap of 1.17 eV.

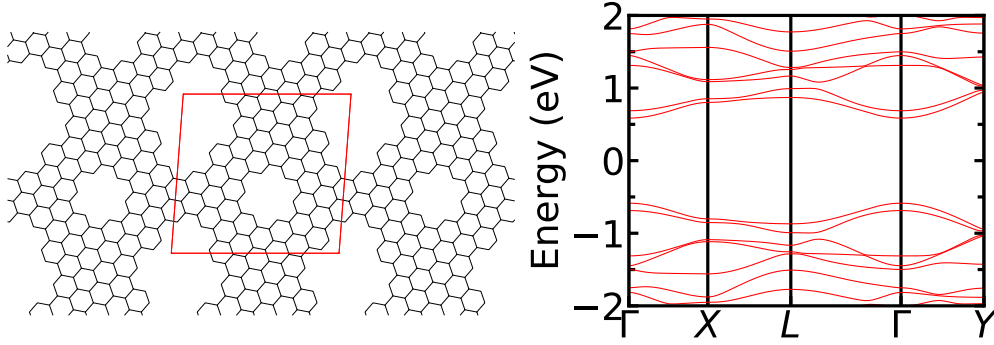

FIG. S33. Tc.

### Td

Structure with label “Td” presenting 324 carbon atoms in the oblique unit cell, inter-molecule bond density  $\eta = 2.67$ , and TB predicted energy gap of 1.64 eV.

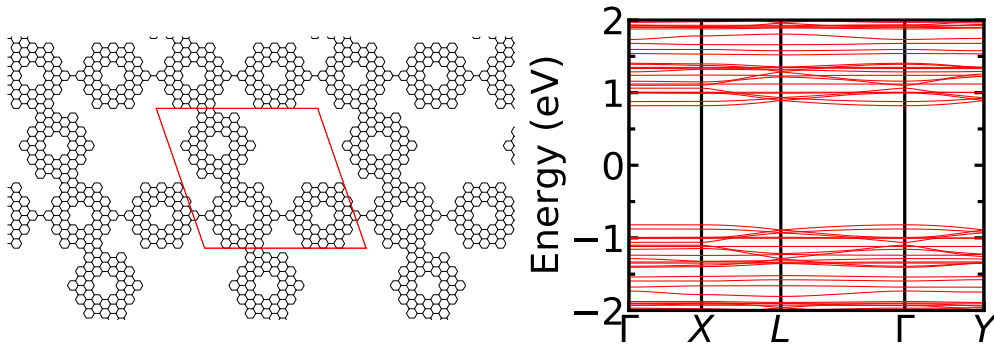

FIG. S34. Td.

## Te

Structure with label “Te” presenting 324 carbon atoms in the oblique unit cell, intermolecule bond density  $\eta = 4.0$ , and TB predicted energy gap of 1.39 eV.

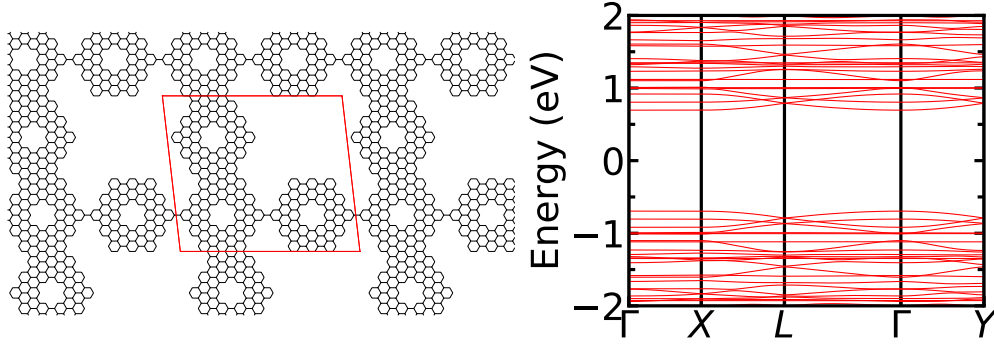

FIG. S35. Te.

## Tf

Structure with label “Tf” presenting 324 carbon atoms in the oblique unit cell, intermolecule bond density  $\eta = 5.33$ , and TB predicted energy gap of 1.35 eV.

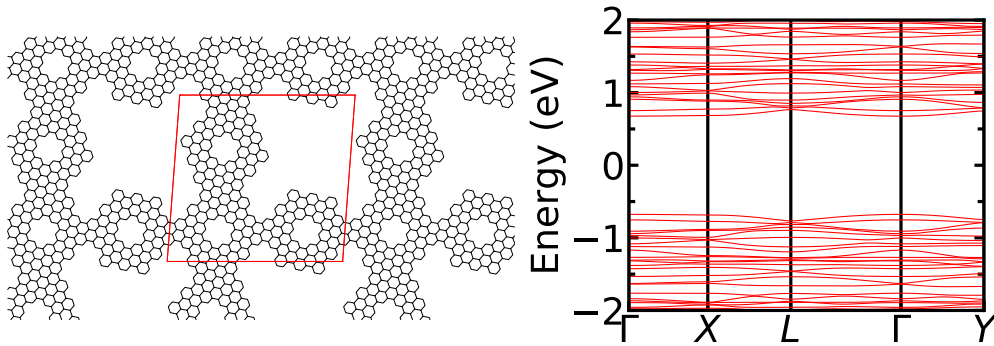

FIG. S36. Tf.

### Ra

Structure with label “Ra” presenting 108 carbon atoms in the 1D unit cell, inter-molecule bond density  $\eta = 1.0$ , and TB predicted energy gap of 1.93 eV.

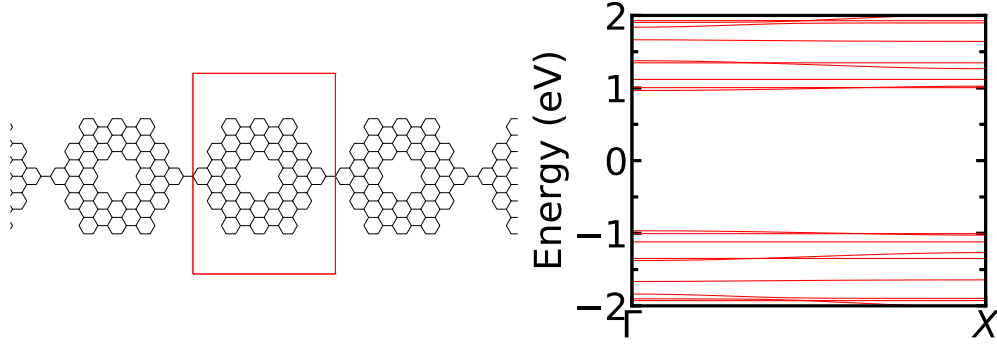

FIG. S37. Ra.

### Rb

Structure with label “Rb” presenting 108 carbon atoms in the 1D unit cell, inter-molecule bond density  $\eta = 3.0$ , and TB predicted energy gap of 1.64 eV.

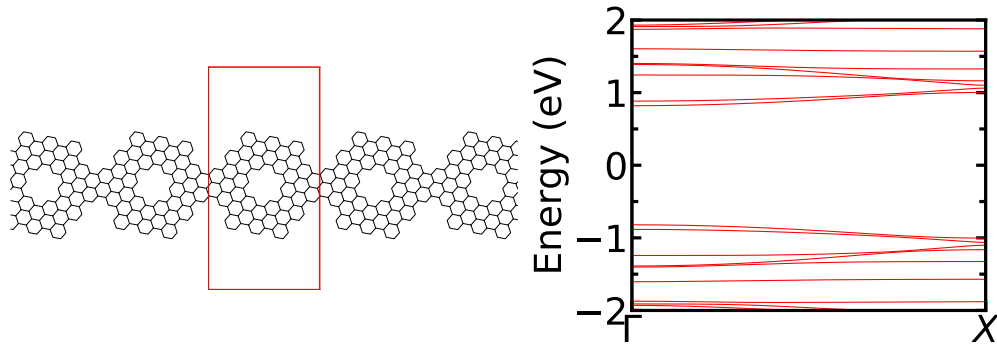

FIG. S38. Rb.

### Rc

Structure with label “Rc” presenting 108 carbon atoms in the 1D unit cell, inter-molecule bond density  $\eta = 5.0$ , and TB predicted energy gap of 1.39 eV.

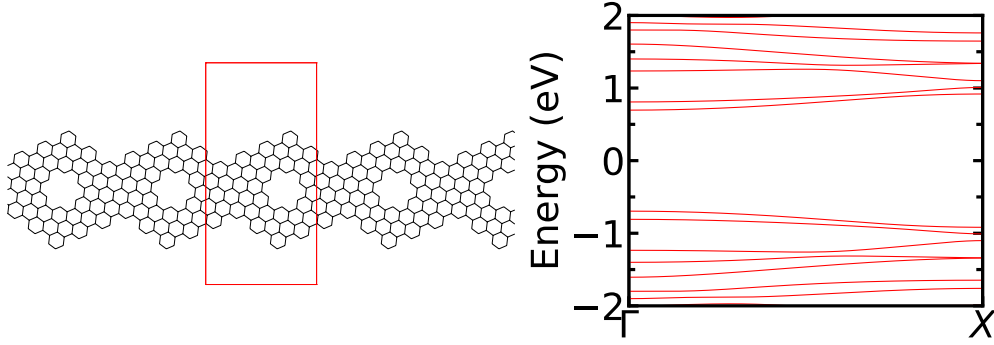

FIG. S39. Rc.

### Rzb

Structure with label “Rzb” presenting 216 carbon atoms in the 1D unit cell, inter-molecule bond density  $\eta = 3.0$ , and TB predicted energy gap of 1.63 eV.

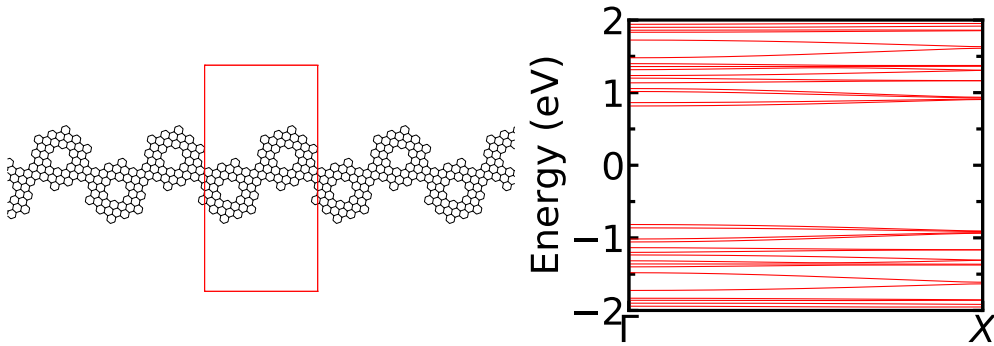

FIG. S40. Rzb.

## Rzc

Structure with label “Rzc” presenting 216 carbon atoms in the 1D unit cell, inter-molecule bond density  $\eta = 5.0$ , and TB predicted energy gap of 1.34 eV.

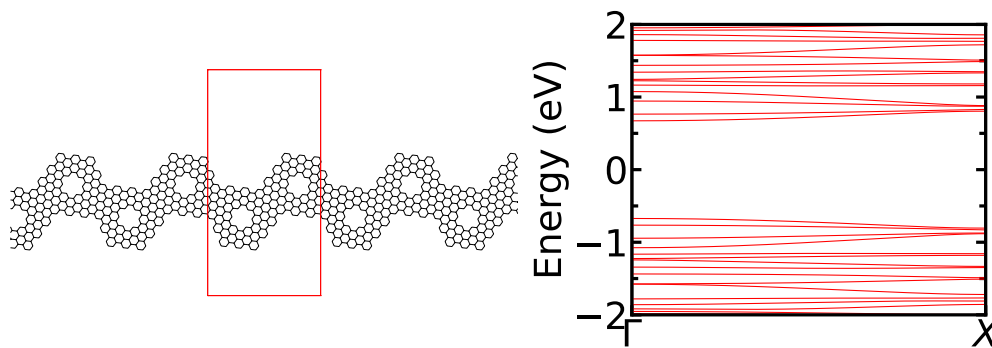

FIG. S41. Rzc.

\* [felipe.lima@lnnano.cnpem.br](mailto:felipe.lima@lnnano.cnpem.br)

† [adalberto.fazzio@lnnano.cnpem.br](mailto:adalberto.fazzio@lnnano.cnpem.br)
